# Supplementary material
Source: MDPI journal article supplement (https://www.mdpi.com/1424-8247/14/7/682)
Supplement: s1 [file s1]

**Table S1: Patient Characteristics for endometrial cancer organoids.**

IHC: immunohistochemistry; WT: wild-type. N.D.: Not determined

| Patient ID | Diagnosis                                | Stage | Age (years) | p53 status        |                         |
|------------|------------------------------------------|-------|-------------|-------------------|-------------------------|
|            |                                          |       |             | Sequence          | IHC                     |
| ONC-6173   | Endometrioid adenocarcinoma              | IA    | 50          | P278T             | Overexpressed           |
| ONC-6071   | Endometrioid adenocarcinoma              | IA    | 47          | WT                | Heterogenous expression |
| ONC-6191   | Endometrioid adenocarcinoma              | IB    | 67          | WT                | N.D.                    |
| ONC-7003   | Mixed serous/endometrioid adenocarcinoma | IA    | 71          | N.D.              | N.D.                    |
| ONC-6051   | Endometrioid adenocarcinoma              | IA    | 69          | WT                | N.D                     |
| ONC-6057   | Serous adenocarcinoma                    | IVB   | 70          | WT                | Overexpressed           |
| ONC-6096   | Endometrioid adenocarcinoma              | IA    | 60          | WT                | Null                    |
| ONC-6099   | Serous adenocarcinoma                    | IVB   | 57          | Frameshift mutant | Null                    |
